# Supplementary material for: Drug Discovery of Host CLK1 Inhibitors for Influenza Treatment
Source: PubMed Central journal article supplement (PMC6332427; doi:10.3390/molecules201119653), 2015-11-02
Supplement: molecules-20-19653-s001.pdf [file molecules-20-19653-s001.pdf]

# Supplementary Informations

Table S1. Details of receptor-ligand interactions in each sample.

| Sample | Name       | Docking Score | Receptor-Ligand Interaction <sup>a</sup>                                             |
|--------|------------|---------------|--------------------------------------------------------------------------------------|
| J10688 | Clypearin  | -35.7352      | 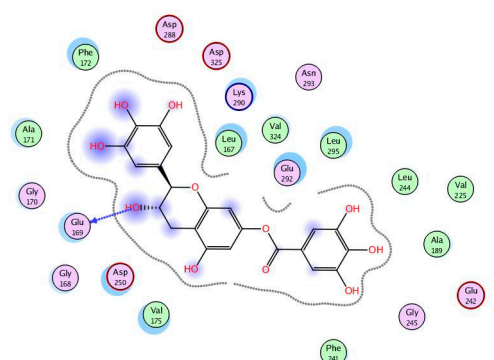   |
| J12098 | Corilagin  | -36.9215      |   |
| J14848 | Pinosylvin | -28.9297      |  |
| J12133 | Chebularin | -53.8421      |  |

Table S1. Cont.

| Sample | Name           | Docking Score | Receptor-Ligand Interaction |
|--------|----------------|---------------|-----------------------------|
| J25986 | Propyl Gallate | -25.2543      |                             |
| J20353 | Hispidulin     | -31.6968      |                             |
| J21548 | Norwogonin     | -24.9415      |                             |
| J11534 | -              | -39.8304      |                             |

Table S1. Cont.

| Sample | Name             | Docking Score | Receptor-Ligand Interaction |
|--------|------------------|---------------|-----------------------------|
| J10610 | Kaempferol       | -27.2038      |                             |
| J20725 | Luteolin         | -29.8188      |                             |
| J10857 | -                | -30.7957      |                             |
| J14528 | Isorhapontigenin | -30.6644      |                             |

Table S1. Cont.

| Sample         | Name                     | Docking Score | Receptor-Ligand Interaction |
|----------------|--------------------------|---------------|-----------------------------|
| J14080         | Epigallocatechin gallate | -30.7234      |                             |
| Methyl gallate | Methyl gallate           | -22.3652      |                             |
| Genistein      | Genistein                | -23.2975      |                             |

  

|                   |                    |                   |              |
|-------------------|--------------------|-------------------|--------------|
| polar             | Sidechain acceptor | Solvent residue   | nonconserved |
| acidic            | Sidechain donor    | Metal complex     | nonpresent   |
| basic             | Backbone acceptor  | Solvent contact   | inconsistent |
| greasy            | Backbone donor     | Metal/ion contact | Arene-arene  |
| proximity contour | Ligand exposure    | Receptor exposure | Arene-H      |
|                   |                    |                   | Arene-cation |
